# Supplementary material for: Electrochemical Sensor Based on Nanodiamonds and Manioc Starch for Detection of Tetracycline
Source: Hindawi journal article supplement (doi:10.1155/2021/6622612), 2021-01-01
Supplement: f1 [file 6622612.f1.docx]

**Supplementary Material**

**Electrochemical sensor based on nanodiamonds and manioc starch for detection of tetracycline**

Wilson Silva Fernandes-Junior1; Leticia Fernanda Zaccarin1, Geiser Gabriel Oliveira2, Paulo Roberto de Oliveira1, Cristiane Kalinke3, Juliano Alves Bonacin3 and Bruno Campos Janegitz1

1 Department of Natural Sciences, Mathematics and Education, Federal University of São Carlos, 13600-970 Araras, SP, Brazil

2 Federal University of Tocantins,77402-970 Gurupi, TO, Brazil

3 Institute of Chemistry, State University of Campinas, 13083-859, Campinas, São Paulo, Brazil

*e-mail address: brunocj@ufscar.br

**S1 – Tetracycline Species Distribution**

**Figure S1. (A)** Species distribution diagrams for the Tc for different pH values; **(B)** Molecular structure of H3Tc.
